1

1 **Title: Revealing  $\alpha$  oscillatory activity using voltage-sensitive dye imaging in monkey V1**

2 *Authors:* Sandrine Chemla<sup>1\*</sup>, Sebastien Roux<sup>2</sup>, Alexandre Reynaud<sup>3</sup>, Frédéric Chavane<sup>2,+</sup> and Rufin

3 VanRullen<sup>1,+</sup>

4 <sup>1</sup> Centre de Recherche Cerveau et Cognition, UMR 5549 CNRS & Université Paul Sabatier Toulouse III,

5 Place du Docteur Baylac, 31059 Toulouse, France

6 <sup>2</sup> Institut de Neurosciences de la Timone (INT), UMR 7289 CNRS & Aix-Marseille Université,

7 27 Bd Jean Moulin, 13385 Marseille cedex 05, France

8 <sup>3</sup> McGill University, McGill Vision Research, Department of Ophthalmology, Montreal, Quebec, Canada

9 *\*Corresponding author:* sandrine.chemla@univ-amu.fr, phone: (33)491324027; fax: +33(0)491324056

10 *+Co-supervisors*

11 *Running title:* Visually-evoked  $\alpha$  oscillations in monkey V1

12 *Number of pages:* 23

13 *Number of figures:* 6

14 *Number of words:* Abstract 138, Introduction 674, Discussion 873

15

16 *Conflict of Interest:* The authors declare no competing interests.

17

3

## 18 **Abstract**

19 The relevance of  $\alpha$  oscillations (7-12Hz) in neural processing, although recognized long ago, remains a major  
20 research question in the field. While intensively studied in humans,  $\alpha$  oscillations appear much less often  
21 investigated (and observed) in monkeys. Here we wish to provide data from non-human primates on stimulus-  
22 related  $\alpha$  rhythm. Indeed, in humans, EEG  $\alpha$  is enhanced in response to non-periodic dynamic visual stimulation  
23 ("perceptual echoes") or to a static stimulus ("flickering wheel illusion"). Do the same visual patterns induce an  
24 oscillatory response in monkey V1? We record voltage-sensitive dye signals from three anesthetized monkeys to  
25 investigate the population-based oscillatory neural response that is not resulting from attention-related feedback  
26 signals. We revealed  $\alpha$  oscillations in monkey V1 which, when they occur, react in a manner comparable to human  
27 studies.

## 28 **Introduction**

29 The occipital  $\alpha$  rhythm is the most dominant rhythm in the awake human brain. It has been known since Hans  
30 Berger's work in 1929 (Berger, 1929) that when you relax with eyes closed, large amplitude rhythmic oscillations  
31 between 7-12 Hz appear above the visual cortex. Thereby, studies of the EEG  $\alpha$  rhythm in humans abound in the  
32 literature. Yet its functional role and relation to visual perception are still little understood and remain a major  
33 subject of research (Thut et al., 2006; Hanslmayr et al., 2007; Busch et al., 2009; Jensen and Mazaheri, 2010;  
34 Lange et al., 2014; Milton et al., 2016). In comparison,  $\alpha$  oscillations have surprisingly not received much attention  
35 in monkeys' physiological research (Jensen et al., 2015), compared to other brain rhythms (Eckhorn et al., 1993;  
36 Schmiedt et al., 2014). This discrepancy could come from the fact that  $\alpha$  is generally suppressed by, or negatively  
37 correlated with visual stimulation (Klimesch et al., 2007), so this rhythm has long been viewed as the "idling" state  
38 of the brain (Pfurtscheller et al., 1996). However,  $\alpha$  is actually not only a spontaneous oscillation: under certain  
39 conditions, it can also be positively driven by the visual stimulus, in relation to perception. In this paper, we  
40 focused on this stimulus-related  $\alpha$ , i.e. increase in  $\alpha$  amplitude evoked (or induced; David, Kilner & Friston, 2006)

4

2

5

41 by the stimulus.

42 First, EEG  $\alpha$  in humans is enhanced in response to random non-periodic dynamic stimulation ("perceptual  
43 echoes", VanRullen and Macdonald, 2012). In that experiment, EEG was recorded while participants watched  
44 random dynamic sequences of luminance values ("white noise", with a flat power spectrum) within a peripheral  
45 disc stimulus. The cross-correlation between the stimulus luminance sequence on each trial and the corresponding  
46 EEG was used to probe the impulse response of the brain's visual system. After early modulations (at lags below  
47 250ms) reflecting the classic visual evoked potential response, a striking 10 Hz oscillation was visible, as if the  
48 brain echoed the stimulation sequence for more than 1 second. In comparison, the cross-correlation between the  
49 same stimulus sequence and a randomly chosen EEG trial did not show the echo. The topographical mapping of  
50 this 10 Hz echo in the cross-correlation functions revealed that the oscillation principally occurred over occipital  
51 electrodes, which suggests a role for the occipital  $\alpha$  rhythm in the maintenance of sensory information over time.

52 Second, EEG  $\alpha$  in humans is also enhanced in response to certain static stimuli ("flickering wheel illusion",  
53 Sokoliuk and VanRullen, 2013). In that experiment, a static wheel (with 32 spokes) produced an illusory  
54 impression of flicker in its center when observed in the visual periphery. Correspondingly, during this illusion the  
55 occipital  $\alpha$  rhythm of the EEG was the only oscillation that showed a clear response peak. The peak was much  
56 decreased in a control condition that did not evoke an illusion of flicker (8-spokes wheel). This study showed that  
57 alpha oscillations can reverberate in response to steady visual stimulation, and suggested that these reverberations  
58 can sometimes exceed the perceptual threshold and be directly experienced as an illusory flicker. Further, this  $\alpha$   
59 reverberation appeared to depend on the spatial content of the stimulus.

60 Together, these two studies using EEG in humans have shown that  $\alpha$  is not only a spontaneous oscillation  
61 but also reflects visual input processing. What is the cortical spatial profile for this stimulus-related  $\alpha$  rhythm?  
62 Human EEG cannot easily answer this question due to its poor spatial resolution. Here, we propose to use voltage-  
63 sensitive dye imaging (VSD) in V1 of three anesthetized monkeys to investigate at high spatial and temporal

6

3

7

64 resolutions whether the same visual stimulus patterns, perceptual echoes and flickering wheel (see Figure 1), could  
65 induce an oscillatory response in Monkey V1 at the population mesoscopic level. Similar to human “perceptual  
66 echoes”, we observed a ~10hz spectral peak in the cross-correlation between the stimulus luminance sequence and  
67 the corresponding VSD response on each trial. Similarly, a 8-spokes static wheel also elicited a 10hz oscillation in  
68 the VSD response, as in the “flickering wheel” illusion.

## 69 **Results**

70  $\alpha$ -band oscillations (centered around 10 Hz) have been extensively studied in the human visual system using scalp-  
71 recorded EEG (Klimesch et al., 1998; Romei et al., 2008), whereas in non-human primates, studies are sparse  
72 (Gilad et al., 2012) and stem from local field potentials (LFP) recordings (Wilke et al., 2006; Spaak et al., 2012). To  
73 investigate the existence and properties of these oscillations in monkey V1, we proposed a mesoscopic approach  
74 using VSD recordings from V1 of three anesthetized monkeys (Fig. 1A-B), visually stimulated with either random  
75 sequences of luminance values within a disc stimulus (« perceptual echoes », Fig. 1C-D) or static images of wheels  
76 retinotopically centered on the retinotopic representation of the recorded cortical region (« static wheel », Fig. 1E-  
77 F). These two stimulation protocols have already demonstrated an enhanced  $\alpha$  oscillatory response in humans  
78 (VanRullen and Macdonald, 2012; Sokoliuk and VanRullen, 2013). Voltage-sensitive dye imaging signals reflect  
79 with a high spatiotemporal resolution the dynamics of cortical processing at the population level, i.e. each pixel  
80 represents the sum of membrane potential changes of about 150-200 neurons (Chemla and Chavane, 2010b).  
81 Therefore, VSDI provides us with the possibility of exploring the emergence of visually-evoked  $\alpha$  oscillations in  
82 V1 and at high spatial resolution.

9

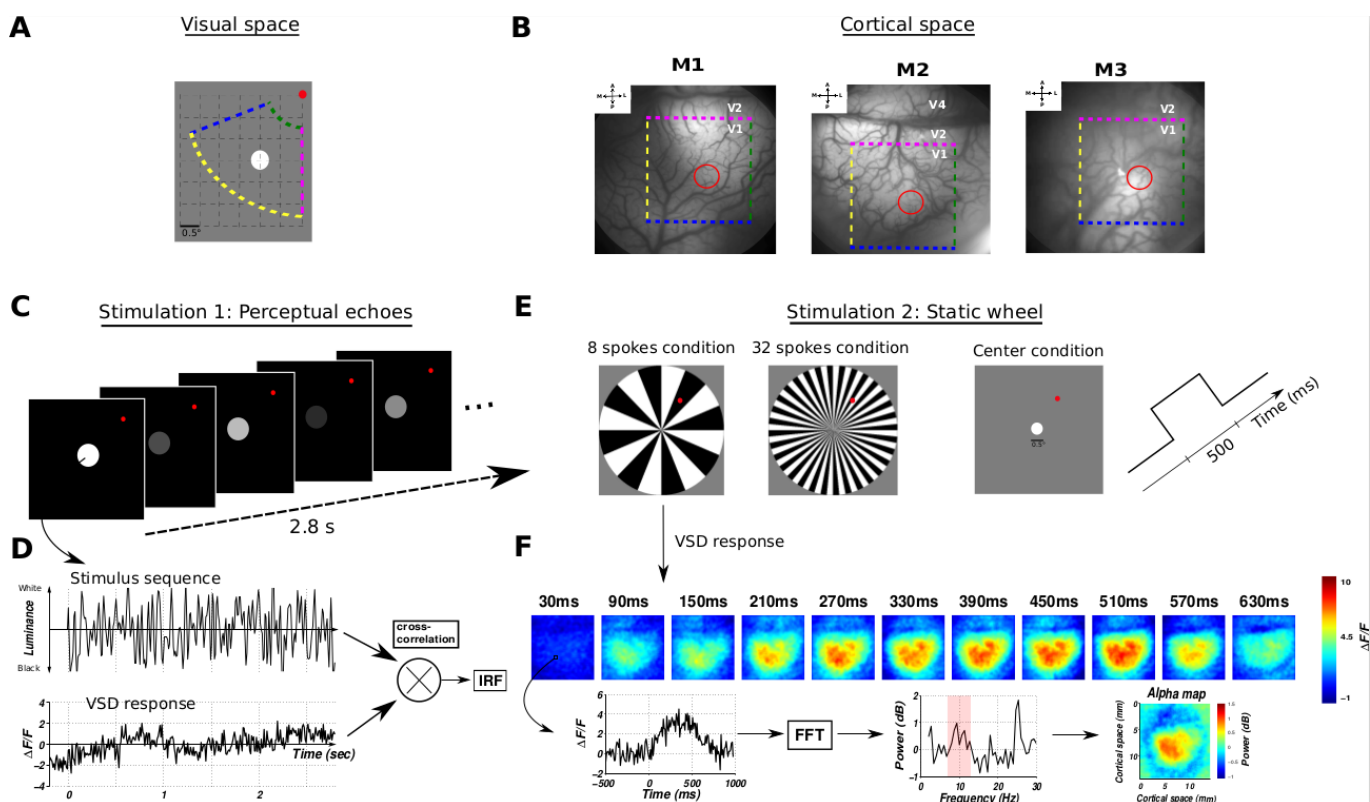

83

FIGURE 1

#### 84 Visual stimuli can generate enhanced $\alpha$ oscillatory responses in monkey V1

85 First, we looked at the cross-correlation between dynamic sequences randomly modulated in luminance (i.e. «  
 86 perceptual echoes » stimulation protocol, see Fig. 1C-D) and the corresponding VSD response. Figure 2A shows  
 87 the averaged cross-correlation functions across trials (and across the entire V1 cortical region-of-interest) for the  
 88 three monkeys, respectively M1, M2 and M3. As in humans (VanRullen & Macdonald, 2012), we can observe for  
 89 each monkey an early-evoked response (marked by a solid arrow) followed (dashed arrows in M1 and M2) or not  
 90 (M3) by an  $\alpha$  oscillation. This oscillation was further characterized in Figure 2B by exploring the power spectrum  
 91 of the cross-correlation computed pixel-by-pixel and averaged (black traces). In order to verify the stimulus-related  
 92 nature of this  $\sim 10$  Hz oscillation, we also performed the same analysis on the cross-correlation functions between  
 93 each input sequence and the VSD response from a randomly chosen trial. As expected, the averaged power  
 94 spectrum of this surrogate, depicted in red on each panel of Figure 2B, is lacking the  $\alpha$  peak. Figure 2C shows the

10

11

95 z-score analysis between these two conditions (the surrogate being averaged over 100 repetitions) for each  
96 frequency. This analysis shows that a stimulus-induced increase in oscillation occurs only at ~10 Hz only for M1  
97 and M2 (threshold of 3.09 z-score which corresponds to p-value of 0.01).

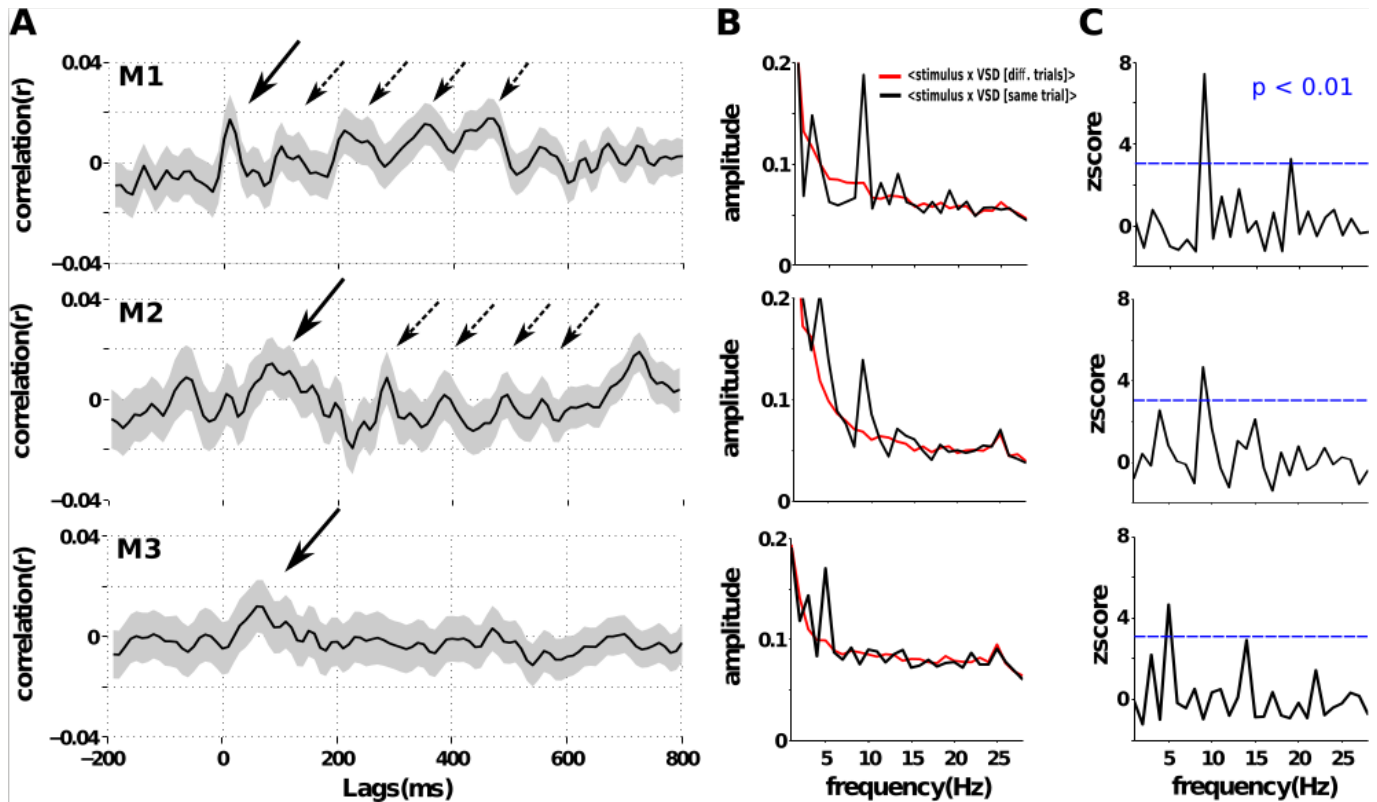

98

FIGURE 2

99 Second, we looked at the spectral analysis of VSD responses to static wheel stimuli (i.e. « static wheel »  
100 stimulation protocol, see Fig. 1E-F) presented with various spatial frequencies. Time-courses of the VSD responses  
101 for each stimulation condition (Gaussian stimulus, 8- and 32-spokes wheel stimuli represented in black, blue and  
102 red respectively) are plotted for the three monkeys in Figure 3, respectively in panels A, D and G. The  
103 corresponding power spectra, computed by Fourier transformation of the VSD data, are then analyzed. One static  
104 wheel stimulus (8 spokes) evoked a clear ~10 Hz oscillatory peak (Figure 3, blue power spectrum for 8-spokes  
105 wheel stimuli) for the same two monkeys M1 (Fig. 3B-C) and M2 (Fig. 3E-F), but not M3 (Fig. 3H-I). Stars on  
106 Fourier plots denote a statistically significant increase of power magnitude relative to a 1/f power spectrum

12

13

107 (nonparametric one-tailed Wilcoxon signed rank test,  $p < 0.001$ ) computed for each frequency in the  $\alpha$  range (6-11  
108 Hz for M1 and 7-12Hz otherwise) of the power spectra.

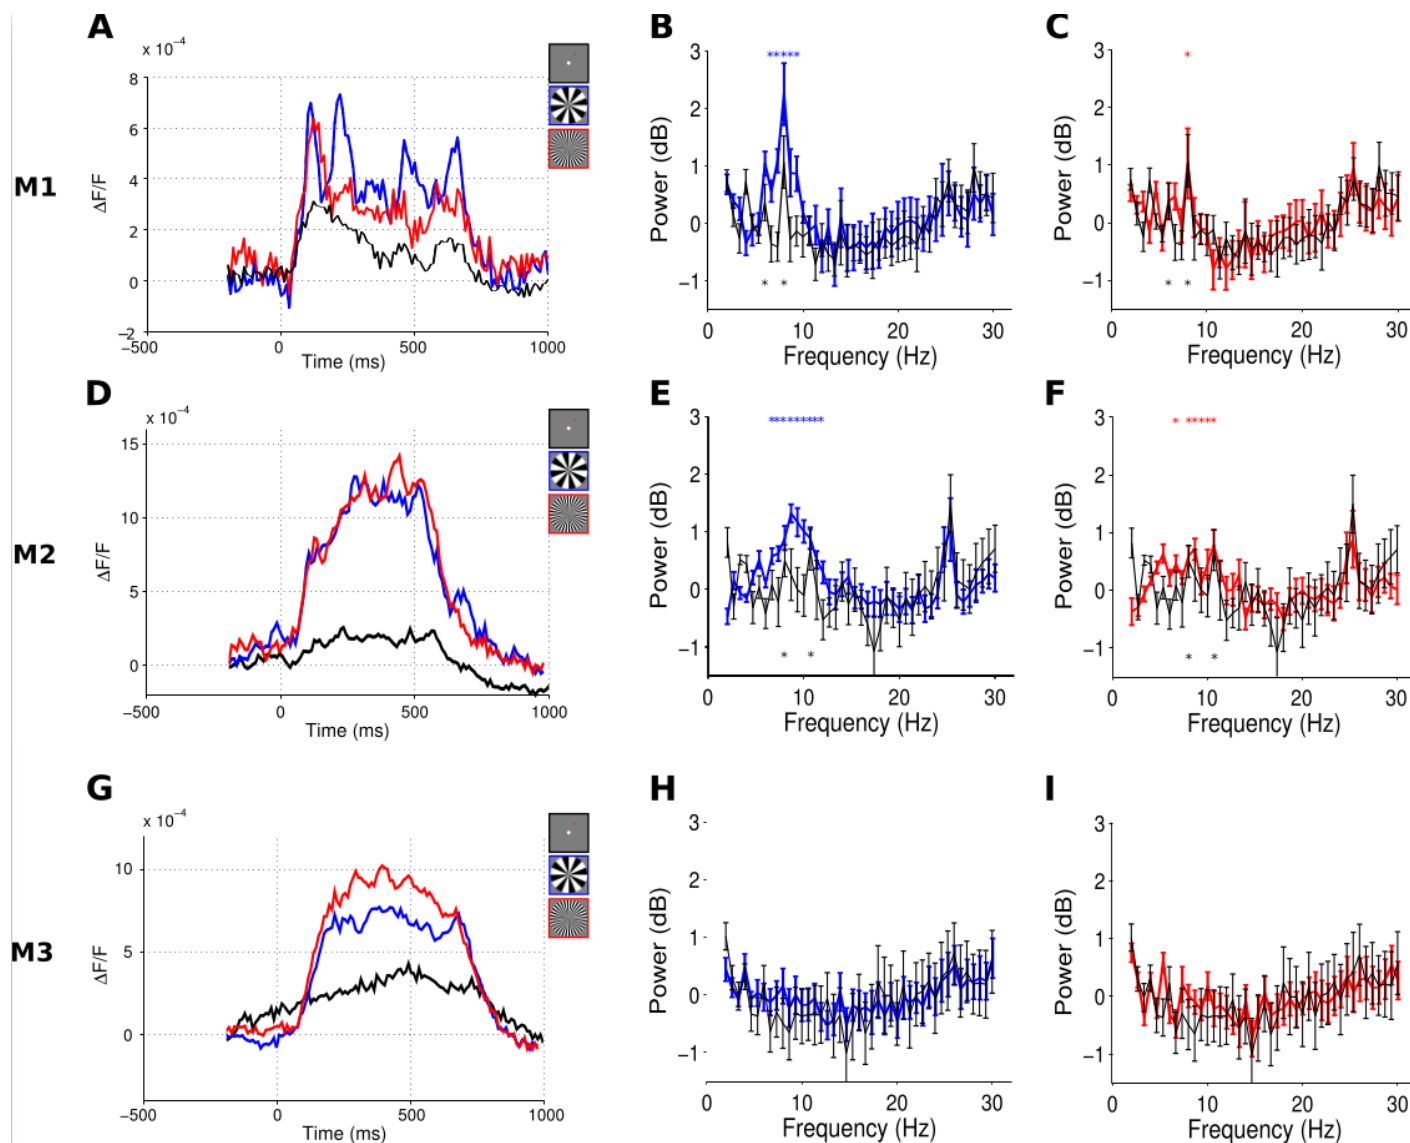

109

FIGURE 3

110  **$\alpha$  oscillatory activity in monkey V1 depends on the spatial frequency of the stimulus**

111 We then wondered whether this power increase in the  $\alpha$ -band systematically varies with the visual stimuli. For both  
112 monkeys, the  $\alpha$  peak seems much stronger for the 8-spokes wheel condition (blue traces) than for the 32-spokes

14

7

15

113 wheel condition (red traces). To test this observation, we combined the two wheel conditions (8- and 32-spokes)  
114 and extracted the peak frequency of the resulting power spectrum (8 Hz for M1 and 8.66 Hz for M2) and we  
115 derived the spatial alpha maps separately for all conditions at that peak frequency (see Figure 4, *bottom rows* for  
116 M1 and M2: Gaussian stimulus, 8- and 32-spokes wheel stimuli in panels A, B and C respectively). In panel D of  
117 Figure 4, we reported the averaged  $\alpha$  amplitude over a specific ROI, shown as black contours on top of all maps.  
118 This ROI corresponds to the cortical representation of the wheel center (highest-level activity pixels in V1 in  
119 response to the local stimulation shown in panel A). For both M1 and M2, the averaged alpha amplitude was  
120 significantly stronger for the 8-spokes wheel stimulus (in blue) than for the other two conditions, i.e. the local  
121 stimulus (in black) and the 32-spokes wheel stimulus (in red; nonparametric Wilcoxon rank sum test,  $p < 0.001$ ).

## 122 **$\alpha$ oscillatory activity in monkey V1 can be dissociated from evoked activity**

123 Qualitatively, both wheel stimuli generated very similar VSD responses (see Fig. 3, A-D-G for the three monkeys  
124 respectively), i.e. in amplitude and time-course, however only the 8 spokes evoked a strong alpha activity. This  
125 suggests that there was no trivial link between alpha oscillatory activity and overall evoked activity level. A  
126 quantitative analysis is reported in Figure 4D (*top rows* for M1 and M2), by temporally averaging the VSD activity  
127 over the steady-state period (spatial activity maps in panels A, B and C, *top rows*). We observed a small difference  
128 in VSD activity for M1 between the two wheel conditions (8- vs. 32-spokes wheel; nonparametric Wilcoxon rank  
129 sum test,  $p = 0.0143$ ) and a significant increase in VSD activity for M2 in response to the 32-spokes wheel stimulus  
130 compared to the 8-spokes wheel stimulus (nonparametric Wilcoxon rank sum test,  $p < 0.001$ ). In both cases, these  
131 results show that there is no link between  $\alpha$  oscillatory activity and the global level of VSD evoked activity.



17

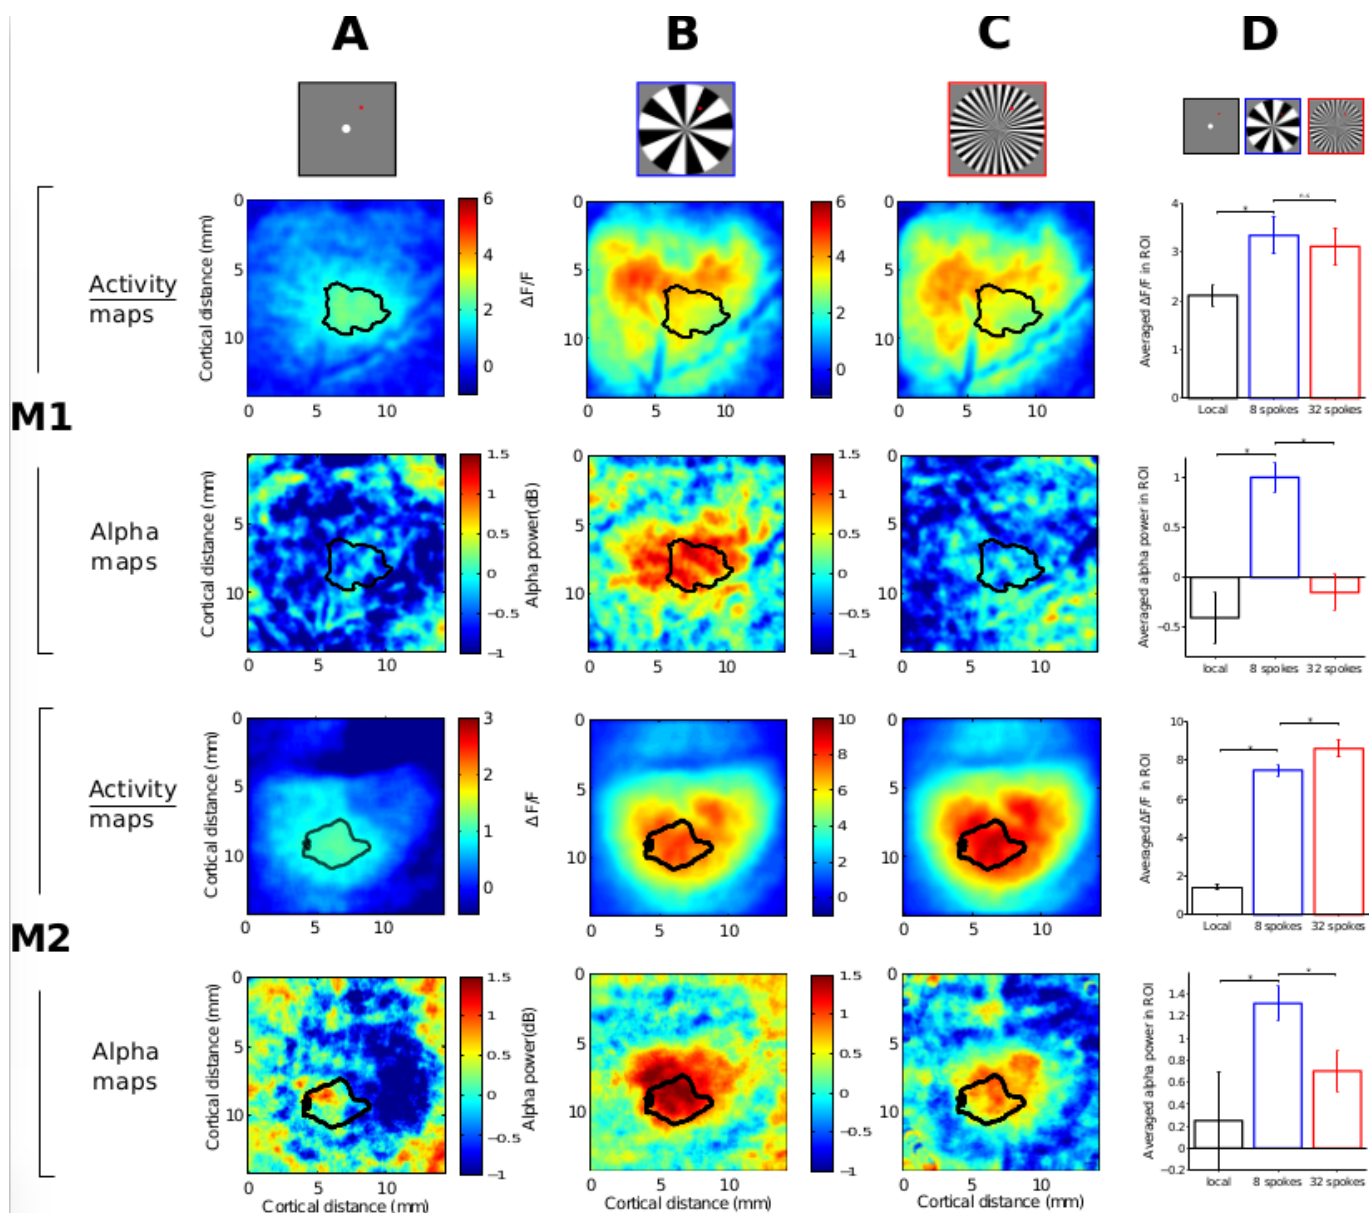

132

FIGURE 4

133  **$\alpha$  oscillatory activity in monkey V1 is maximal at the wheel's center and decreases rapidly with eccentricity**

134 Finally, we explored the spatial dependence of the  $\alpha$  activity relative to the center of the wheel stimuli (specifically  
 135 in the 8-spokes wheel condition, where the strongest alpha response was recorded). For both monkeys, we  
 136 determined the center of mass of the local ROI depicted in black in Figure 4, and from this point we computed an  
 137 isotropic distance map (see Figure 5A) in order to plot both the VSD activity (in black) and the  $\alpha$  amplitude (in

18

9

19

138 blue) distributions in response to the 8-spokes wheel stimulus (see respective maps in Fig. 4B) as a function of  
139 eccentricity from center. The distributions were normalized to their maximum and fitted to a 1D Gaussian function  
140 of the form :

141 
$$G(t) = A * \exp(-(x-\mu).^2 / (2 * \sigma^2)),$$

142 where  $\mu$  and  $\sigma$  are respectively the mean and the standard deviation. The amplitude distributions (mean  $\pm$  SD) and  
143 fits were then superimposed in Figure 5B for M1 and Figure 5C for M2. This analysis provided us with two  
144 interesting results: i) the strongest  $\alpha$  oscillatory activity lies in or around the retinotopic position of the wheel's  
145 center (blue curves,  $\mu = 0$  and  $\mu = 0.4$  for M1 and M2 respectively), consistent with subjective reports of the  
146 flickering wheel illusion in human subjects; Sokoliuk and VanRullen, 2013); ii)  $\alpha$  oscillatory activity is more local  
147 since it decreases rapidly along cortical space (blue curves,  $\sigma = 3.1$  and  $\sigma = 2.0$  for M1 and M2 respectively),  
148 whereas the VSD response extends much further (black curves,  $\sigma = 4.6$  and  $\sigma = 4.0$  for M1 and M2 respectively).  
149 Note that another recording session in monkey M2 one week later showed reproducibility of the results (see  
150 Supplementary Figure).

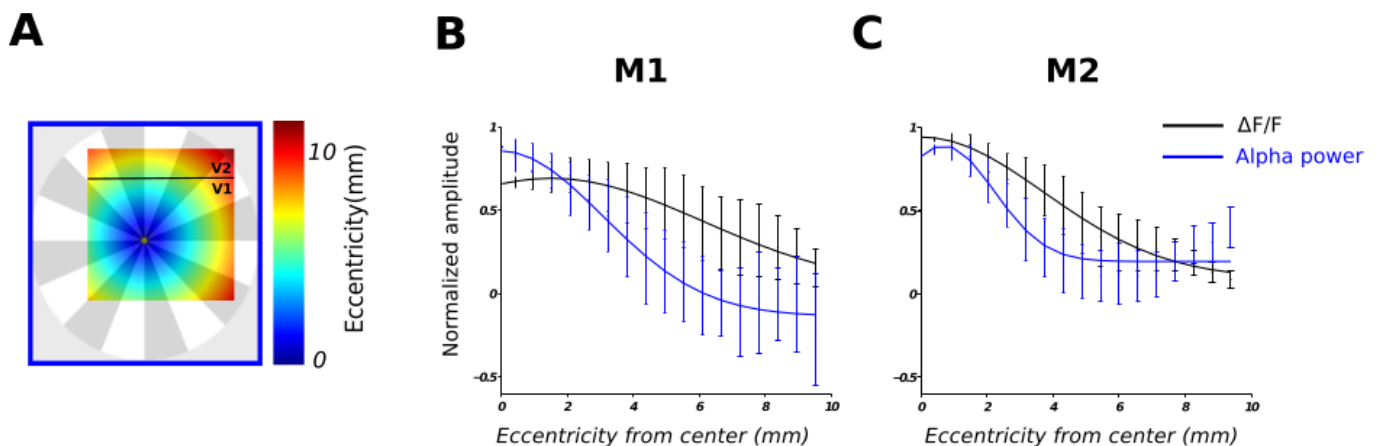

152

FIGURE 5

20

10

21

153

## 154 **Discussion**

155 We used voltage-sensitive dye imaging from V1 in three anesthetized monkeys to investigate the presence of  
156 oscillatory activity in response to specific visual stimulation previously tested in human EEG. In two monkeys, we  
157 observed a ~10hz spectral peak in the cross-correlation between random, non-periodic dynamic luminance  
158 sequences and the corresponding VSD response on each trial. The same two monkeys also showed a ~10hz  
159 oscillatory response when visually stimulated with a static wheel. In conclusion, both visual stimulation protocols  
160 (i.e. « perceptual echoes » and « static wheel », see methods) induced  $\alpha$ -band oscillations in V1 of two of the three  
161 monkeys. Altogether, our results are in accordance with the human studies (respectively VanRullen and  
162 MacDonald, 2012 and Sokoliuk and VanRullen, 2013):  $\alpha$ -frequency reverberations can be observed in response to  
163 specific visual stimuli; the magnitude of this alpha response depends on the type of stimulation (spatial frequency  
164 of the wheel), but it can be dissociated from stimulus-evoked activity. Therefore the current study demonstrates  
165 that, in monkeys,  $\alpha$ -band activity, generally thought of as spontaneous fluctuations or an ‘idling rhythm’, can also  
166 be linked to visual processing.

167 Interestingly, not all monkeys exhibited  $\alpha$  oscillations. This inter-individual variability in monkeys is  
168 reminiscent of inter-individual differences in human  $\alpha$  rhythm. The latter have been widely studied (Klimesch et  
169 al., 1999; 2003; Olbrich and Achermann, 2005; Bodenmann et al., 2009) and have been shown to be large and  
170 mainly dependent on age and genetic factors. For example, in a recent study dedicated to inter- and intra-individual  
171 variability in alpha peak frequency, Haegens and collaborators reported a lack of alpha peak in the spectra of some  
172 participants (Haegens et al., 2014). However, the reason for such notable difference in those individuals remains  
173 unanswered.

174 Inspecting the  $\alpha$  dependence on the spatial frequency of the wheel stimulus (8- vs 32-spokes wheel), we  
175 surprisingly reported that humans and monkeys show opposite preference. Indeed, the spatial frequency of the

22

23

176 wheel pattern that generated the strongest  $\alpha$  fluctuations in monkeys (8-spokes; Fig. 4B) does not induce an  
177 oscillatory perception in humans (Sokoliuk and VanRullen, 2013; their Fig 2A). Although an hypothesis about  
178 difference in consciousness states cannot be totally rejected (Purdon et al., 2013), we rather suggest that the relative  
179 preference is more likely to be explained by differences in the spatial organization of the visual cortex between the  
180 two species (Dow et al., 1981; Van Essen et al., 1984; Dumoulin and Wandell, 2008; Harvey and Dumoulin, 2011),  
181 e.g. cortical magnification factor, receptive field size, eccentricity maps, and remains to be explored.

182         The current study analyzing VSDI recordings in monkey V1 gave us the opportunity to explore the neural  
183 basis of stimulus-related  $\alpha$  oscillations. This question is indeed difficult to address, since  $\alpha$ -band oscillations are  
184 ubiquitous in the brain. They have been simultaneously observed in many brain regions, the thalamus and the  
185 cortex being the two major candidate generators. The debate on the genesis of  $\alpha$ -band oscillations mainly focused  
186 on thalamocortical resonance (Steriade et al., 1990; Bollimunta et al., 2011) and cortical feedback (Buffalo et al.,  
187 2011; Van Kerkoerle et al., 2011) mechanisms. However, finding the origins of alpha-frequency oscillations does  
188 not necessarily reveal whether they play a role in visual information processing. Here, we showed that an  
189 oscillatory activity in the  $\alpha$ -band occurs in V1 and that this oscillation can be induced by the visual stimulation.  
190 Therefore, we explicitly provided a link between the  $\alpha$  rhythm and visual input processing in monkey V1.  
191 Furthermore, we revealed that the  $\alpha$  peak is localized in space at the retinotopic position of the wheel's center while  
192 it is not necessarily the case for the peak of VSD activity; and the spatial extent of alpha reverberations was also  
193 limited compared to the corresponding VSD evoked activity (Fig. 5). This localized reverberatory activity could  
194 therefore be part of the neural substrates accounting for the perception of an illusory regular flicker restricted to the  
195 wheel center, previously reported in humans (Sokoliuk and VanRullen, 2013).

196         Finally, this study has been done on anesthetized monkeys in order to demonstrate that  $\alpha$  oscillations are  
197 stimulus-induced and not resulting from task-dependent feedback signals related to attention (van Kerkoerle et al.,  
198 2014) or other higher-order phenomenon (Gilbert and Li, 2013). In addition, with anesthetized and paralyzed  
199 monkeys, we ruled out the possible idea that the  $\alpha$  rhythm could have been solely induced by small microsaccades

24

25

200 made during fixation (Dimigen et al., 2011). We can wonder whether the same oscillations could be induced in  
201 awake monkeys. Indeed, ongoing activity in the  $\alpha$ -band is well known to be prominent in a quiet awake state and  
202 linked to conscious perception (Ruhnau et al., 2014) and attention (Klimesch 2012), all of which are likely to be  
203 negatively affected by anaesthesia. However, as we focused our study on stimulus-related rather than spontaneous  
204  $\alpha$  activity, we surmise that our results should not solely reflect the anesthesia level (although anesthesia could be  
205 responsible for other mechanisms in the  $\alpha$ -band (e.g. Vijayan et al., 2013; Flores et al., 2017)). Nevertheless,  
206 testing awake monkeys with behavioral feedback will be a straightforward follow-up to the present study, to  
207 confirm that monkeys perceive the stimuli as humans do, and deepen our knowledge, still largely incomplete, about  
208 the neural basis of  $\alpha$ -band oscillations.

## 209 **Materials and Methods**

### 210 **Experimental procedures**

211 The experiments were conducted on three monkeys (three female macaca fascicularis). Experimental protocols  
212 have been approved by the Marseille Ethical Committee in Neuroscience (approval A10/01/13, official national  
213 registration 71-French Ministry of Research). All procedures complied with the French and European regulations  
214 for animal research, as well as the guidelines from the Society for Neuroscience.

215 ***Surgical preparation, anesthesia and VSD imaging protocol*** The monkeys were chronically implanted with a  
216 recording chamber over the right hemisphere. Subsequently the dura-mater of the primary visual cortex (V1) was  
217 removed surgically over the recording aperture (18mm diameter) and a silicon-made artificial dura-mater was  
218 inserted under aseptic conditions to insure a good preparation and an optical access to the cortex (Arieli et al.,  
219 1995). The day of a recording session, the monkeys were initially anesthetized with intramuscular Ketamine  
220 (10mg/kg), Xylazine (0.5mg/kg) and Robinul (0.1mg/kg). Then continuous anesthesia was induced with an  
221 intravenous (IV) propofol bolus (2.5mg/kg) and maintained with slow IV propofol infusion (0.3mg/kg/min), while  
222 monkeys were artificially ventilated. Animals were then paralyzed with rocuronium bromide (esmeron,  
223 0.5mg/kg/h), the left eye was dilated using atropine and a contact lens was placed to prevent drying. During the

26

27

224 experimental protocol, physiological parameters, i.e. temperature, heart frequency, concentration of expired carbon  
225 dioxide and oxygen saturation level, were monitored every 30 minutes. At the end of experimental recordings,  
226 propofol and esmeron infusions were stopped and the animal recovered in a very short time (less than 20 minutes  
227 on average). The train-of-four (TOF) twitch technique was used to verify induction and reversal of paralysis  
228 (Hughes and Griffiths, 2002). Before recordings, the cortex was stained for three hours with the voltage-sensitive  
229 dye RH-1691 (Optical Imaging) prepared in artificial cerebrospinal fluid (aCSF) at a concentration of 0.2 mg/ml  
230 and filtered through a 0.2  $\mu\text{m}$  filter. After this staining period, the chamber was rinsed thoroughly with filtered  
231 aCSF to wash out any supernatant dye, the artificial dura-mater was inserted back in position and the chamber was  
232 closed with transparent agar and cover glass. Subsequently, optical signals were recorded from a focal plane  $\sim 300$   
233  $\mu\text{m}$  below the cortical surface using a Dalstar camera (512 x 512 pixels resolution, frame rate of 110 Hz) driven by  
234 the Imager 3001 system (Optical Imaging). Excitation light was provided by a 100W halogen lamp filtered at 630  
235 nm and fluorescent signals were high-pass filtered at 665 nm. The surgical preparation and VSD imaging protocol  
236 have been described in detail in Reynaud et al. (2012).

237 **Visual stimulation** The visual stimuli consisted of either randomly generated sequences (2.8 sec duration, 80 trials)  
238 of luminance values (from 0 to 255 screen gun values, from 2 to 130  $\text{cd.m}^{-2}$ ) displayed within a peripheral disc  
239 stimulus (radius: 1.5 degrees of visual angle) on a black background after a pre-stimulus period of 200 ms  
240 ("perceptual echoes" protocol) or png images of 8- and 32-spokes wheels (radius: 13.77 degrees of visual angle, 30  
241 trials) displayed on a gray background for 500 ms after a pre-stimulus period of 500 ms ("static wheel" protocol).  
242 In addition, a blank condition, i.e. where no visual stimulus was presented on the screen, was also used in both  
243 protocols for the corresponding duration and same number of trials, whereas a local stimulation condition, i.e.  $1^\circ$   
244 diameter Gaussian blob, was only used for the static wheel protocol. Stimuli were displayed monocularly at 60 Hz  
245 on a gamma corrected LCD monitor (placed at 57 cm distance from the animal eye plane) using the Elphy software  
246 (G. Sadoc, Unic, Paris), communicating with the VDAQ acquisition system (Optical Imaging). The position of the  
247 fovea was initially located with a retinal angiography, projected back on the screen using a mirror and all stimuli  
248 were centered on the bottom-left at ( $-1^\circ$ ,  $-2^\circ$ ) from the foveal position (red dots in Fig. 1A-C-E, not visible during

28

29

249 recordings).

## 250 **Data analyses**

251 Stacks of images were stored on hard-drives for off-line analysis with MATLAB R2014a (MathWorks), using the  
252 Optimization, Statistics, and Signal Processing Toolboxes.

253 **VSD evoked activity** For both protocols, the evoked response to each stimulus was computed in three successive  
254 basic steps. First, the recorded value at each pixel was divided by the average value before stimulus onset (frames 0  
255 division) to remove slow stimulus-independent fluctuations in illumination and background fluorescence levels.  
256 Second, this value was subsequently subtracted by the value obtained for the blank condition (blank subtraction) to  
257 eliminate most of the noise due to heartbeat and respiration (Shoham et al., 1999). Third, a linear detrending of the  
258 timeseries was applied to remove residual slow drifts induced by dye bleaching (Chen et al., 2008; Meirovithz et  
259 al., 2010). In addition, for the “static wheel” protocol, a spatial smoothing (convolving the raw matrix with a 5x5  
260 pixel flat matrix) and spatial z-score normalization were applied on each evoked averaged map (Fig. 4, *top rows*).  
261 The latter was done by dividing them by the standard deviation of the blank condition map, pixel by pixel. In  
262 Figure 3, the time-course traces (*top row*) result from a spatial averaging over a specific region of interest (ROI),  
263 shown as black contours in Figure 4. These ROIs correspond to high-level activity pixels in V1 in response to the  
264 local stimulation, i.e. stimulation of the center of the wheel stimuli (Fig. 4A, z-score = 2).

265 **Frequency analysis** For the “perceptual echoes” protocol, we first estimated pixel-by-pixel the cross-correlation  
266 function between each VSD trial and the corresponding visual stimulation sequence resampled at 100 Hz. For each  
267 pixel, we averaged the cross-correlation functions across trials (after excluded the first 0.5 s of each VSD trial and  
268 each stimulus sequence) and then performed a Fourier transform of this averaged cross-correlation function to  
269 derive its amplitude spectrum. Finally, we computed the averaged power spectrum across pixels (over the entire V1  
270 cortical region-of-interest). For the “static wheel” protocol, power spectra for each condition were directly  
271 computed by Fourier transformation of the single-trial VSD data, pixel-by-pixel, and averaged across trials.  
272 Corresponding 1/f fits computed over the range of frequencies from 2 to 30 Hz were subsequently removed to  
273 obtain the final amplitude spectra. Spatial  $\alpha$  maps can then be derived by specifically looking at one (e.g. peak

30

15

31

274 frequency of the spectrum) or the average of several frequencies in the  $\alpha$  range (6-11 Hz for M1 and 7-12Hz  
275 otherwise).

276 **Statistical procedure** We used two-tailed nonparametric Wilcoxon signed rank test for two-sample or paired data  
277 with  $P < 0.001$  considered significant, except where otherwise stated (one-tailed).

## 278 **Acknowledgments**

279 The authors are thankful to Pierre Simeone, and the CE2F-PRIM team, for their help with the experiments. The  
280 authors acknowledge fundings from the ERC Consolidator grant P-CYCLES number 614244, the ANR BalaV1  
281 (ANR-13-BSV4-0014-02) and FRQS Vision Health Research Network of Quebec networking grant.

## 282 **Competing interests**

283 The authors declare no competing interests.

## 284 **References**

- 285 Arieli A, Shoham D, Hildesheim R, Grinvald A (1995) Coherent spatiotemporal patterns of ongoing activity  
286 revealed by real-time optical imaging coupled with single-unit recording in the cat visual cortex. *J*  
287 *Neurophysiol* 73:2072-2093.
- 288 Berger, H. (1929). Über das elektrenkephalogramm des menschen. *European Archives of Psychiatry and Clinical*  
289 *Neuroscience*, 87(1), 527-570.
- 290 Bodenmann, S., Rusterholz, T., Dürr, R., Stoll, C., Bachmann, V., Geissler, E., ... & Landolt, H. P. (2009). The  
291 functional Val158Met polymorphism of COMT predicts interindividual differences in brain  $\alpha$  oscillations in  
292 young men. *Journal of Neuroscience*, 29(35), 10855-10862.
- 293 Bollimunta, A., Mo, J., Schroeder, C. E., & Ding, M. (2011). Neuronal mechanisms and attentional modulation of  
294 corticothalamic alpha oscillations. *Journal of Neuroscience*, 31(13), 4935-4943.
- 295 Buffalo, E. A., Fries, P., Landman, R., Buschman, T. J., & Desimone, R. (2011). Laminar differences in gamma and  
296 alpha coherence in the ventral stream. *Proceedings of the National Academy of Sciences*, 108(27), 11262-  
297 11267.

32



33

- 298 Busch, N. A., Dubois, J., & VanRullen, R. (2009). The phase of ongoing EEG oscillations predicts visual  
299 perception. *Journal of Neuroscience*, 29(24), 7869-7876.
- 300 Chemla S, Chavane F (2010). Voltage-sensitive dye imaging: Technique review and models. *J Physiol (Paris)*  
301 104:40-50.
- 302 Chemla, S., & Chavane, F. (2010). A biophysical cortical column model to study the multi-component origin of the  
303 VSDI signal. *Neuroimage*, 53(2), 420-438.
- 304 Chen Y, Geisler WS, Seidemann E (2008). Optimal temporal decoding of neural population responses in a reaction-  
305 time visual detection task. *Journal of neurophysiology*, 99:1366-1379.
- 306 Dow, B. M., Snyder, A. Z., Vautin, R. G., & Bauer, R. (1981). Magnification factor and receptive field size in  
307 foveal striate cortex of the monkey. *Experimental Brain Research Experimentelle Hirnforschung*  
308 *Expérimentation Cérébrale*, 44(2), 213–228.
- 309 Dimigen O, Werkle-Bergner M, Meyberg S, Kliegl R and Sommer W (2011). Microsaccades and EEG alpha  
310 oscillations: a close relationship? *Front. Hum. Neurosci. Conference Abstract: XI International Conference on*  
311 *Cognitive Neuroscience (ICON XI)*. doi: 10.3389/conf.fnhum.2011.207.00128
- 312 Dumoulin, S. O., & Wandell, B. A. (2008). Population receptive field estimates in human visual cortex.  
313 *NeuroImage*, 39(2), 647–660.
- 314 Eckhorn, R., Frien, A., Bauer, R., Woelbern, T., & Kehr, H. (1993). High frequency (60-90 Hz) oscillations in  
315 primary visual cortex of awake monkey. *Neuroreport*, 4(3), 243-246.
- 316 Flores, F. J., Hartnack, K. E., Fath, A. B., Kim, S. E., Wilson, M. A., Brown, E. N., & Purdon, P. L. (2017).  
317 Thalamocortical synchronization during induction and emergence from propofol-induced unconsciousness.  
318 *Proceedings of the National Academy of Sciences*, 114(32), E6660-E6668.
- 319 Gilad, A., Meirovithz, E., Leshem, A., Arieli, A., & Slovin, H. (2012). Collinear stimuli induce local and cross-  
320 areal coherence in the visual cortex of behaving monkeys. *PloS one*, 7(11), e49391.
- 321 Gilbert, C. D., & Li, W. (2013). Top-down influences on visual processing. *Nature Reviews Neuroscience*, 14(5),  
322 350-363.

34

35

- 323 Haegens, S., Cousijn, H., Wallis, G., Harrison, P. J., & Nobre, A. C. (2014). Inter-and intra-individual variability in  
324 alpha peak frequency. *Neuroimage*, *92*, 46-55.
- 325 Hanslmayr, S., Aslan, A., Staudigl, T., Klimesch, W., Herrmann, C. S., & Bäuml, K. H. (2007). Prestimulus  
326 oscillations predict visual perception performance between and within subjects. *Neuroimage*, *37*(4), 1465-  
327 1473.
- 328 Harvey, B. M., & Dumoulin, S. O. (2011). The Relationship between Cortical Magnification Factor and Population  
329 Receptive Field Size in Human Visual Cortex: Constancies in Cortical Architecture. *Journal of Neuroscience*,  
330 *31*(38), 13604–13612.
- 331 Hughes, S., & Griffiths, R. (2002). Anaesthesia monitoring techniques. *Anaesthesia and Intensive Care Medicine*.  
332 *The Medicine Publishing Company Ltd*, pp. 477-480.
- 333 Jensen, O., & Mazaheri, A. (2010). Shaping functional architecture by oscillatory alpha activity: gating by  
334 inhibition. *Frontiers in human neuroscience*, *4*, 186.
- 335 Klimesch, W., Doppelmayr, M., Russegger, H., Pachinger, T., & Schwaiger, J. (1998). Induced alpha band power  
336 changes in the human EEG and attention. *Neuroscience letters*, *244*(2), 73-76.
- 337 Klimesch, W. (1999). EEG alpha and theta oscillations reflect cognitive and memory performance: a review and  
338 analysis. *Brain research reviews*, *29*(2), 169-195.
- 339 Klimesch, W., Sauseng, P., & Gerloff, C. (2003). Enhancing cognitive performance with repetitive transcranial  
340 magnetic stimulation at human individual alpha frequency. *European Journal of Neuroscience*, *17*(5), 1129-  
341 1133.
- 342 Klimesch, W., Sauseng, P., & Hanslmayr, S. (2007). EEG alpha oscillations: the inhibition–timing hypothesis.  
343 *Brain research reviews*, *53*(1), 63-88.
- 344 Klimesch, W. (2012). Alpha-band oscillations, attention, and controlled access to stored information. *Trends in*  
345 *cognitive sciences*, *16*(12), 606-617.
- 346 Lange, J., Keil, J., Schnitzler, A., van Dijk, H., & Weisz, N. (2014). The role of alpha oscillations for illusory  
347 perception. *Behavioural brain research*, *271*, 294-301.

36

18

37

- 348 Meirovithz E, Ayzenshtat I, Bonnef YS, Itzhack R, Werner-Reiss U, Slovin H (2010) Population response to  
349 contextual influences in the primary visual cortex. *Cereb Cortex* 20:12930-1304.
- 350 Milton, A., & Pleydell-Pearce, C. W. (2016). The phase of pre-stimulus alpha oscillations influences the visual  
351 perception of stimulus timing. *NeuroImage*, 133, 53-61.
- 352 Muller, L., Reynaud, A., Chavane, F., & Destexhe, A. (2014). The stimulus-evoked population response in visual  
353 cortex of awake monkey is a propagating wave. *Nature communications*, 5.
- 354 Olbrich, E., & Achermann, P. (2005). Analysis of oscillatory patterns in the human sleep EEG using a novel  
355 detection algorithm. *Journal of sleep research*, 14(4), 337-346.
- 356 Pfurtscheller, G., Stancak, A., & Neuper, C. (1996). Event-related synchronization (ERS) in the alpha band—an  
357 electrophysiological correlate of cortical idling: a review. *International journal of psychophysiology*, 24(1),  
358 39-46.
- 359 Purdon, P. L., Pierce, E. T., Mukamel, E. A., Prerau, M. J., Walsh, J. L., Wong, K. F. K., ... & Ching, S. (2013).  
360 Electroencephalogram signatures of loss and recovery of consciousness from propofol. *Proceedings of the*  
361 *National Academy of Sciences*, 110(12), E1142-E1151.
- 362 Reynaud A, Masson GS, Chavane F (2012) Dynamics of local input normalization result from balanced short-and  
363 long-range intracortical interactions in area v1. *J Neurosci* 32:12558-12569.
- 364 Romei, V., Brodbeck, V., Michel, C., Amedi, A., Pascual-Leone, A., & Thut, G. (2008). Spontaneous fluctuations in  
365 posterior  $\alpha$ -band EEG activity reflect variability in excitability of human visual areas. *Cerebral cortex*, 18(9),  
366 2010-2018.
- 367 Ruhnau, P., Hauswald, A., & Weisz, N. (2014). Investigating ongoing brain oscillations and their influence on  
368 conscious perception—network states and the window to consciousness. *Frontiers in Psychology*, 5 (1230).
- 369 Schmiedt, J. T., Maier, A., Fries, P., Saunders, R. C., Leopold, D. A., & Schmid, M. C. (2014). Beta oscillation  
370 dynamics in extrastriate cortex after removal of primary visual cortex. *Journal of Neuroscience*, 34(35),  
371 11857-11864.

38

19

39

- 372 Shoham D, Glaser D, Arieli A, Kenet T, Wijnbergeb C, Toledo Y, Hildesheim R, Grinvald A (1999) Imaging  
373 cortical dynamics at high spatial and temporal resolution with novel blue voltage-sensitive dyes. *Neuron*,  
374 24:791-802.
- 375 Sokoliuk R, VanRullen R (2013) The flickering wheel illusion: When  $\alpha$  rhythms make a static wheel flicker. *The*  
376 *Journal of Neuroscience*, 33:13498-13504.
- 377 Spaak, E., Bonnefond, M., Maier, A., Leopold, D. A., & Jensen, O. (2012). Layer-specific entrainment of gamma-  
378 band neural activity by the alpha rhythm in monkey visual cortex. *Current Biology*, 22(24), 2313-2318.
- 379 Thut, G., Nietzel, A., Brandt, S. A., & Pascual-Leone, A. (2006).  $\alpha$ -Band electroencephalographic activity over  
380 occipital cortex indexes visuospatial attention bias and predicts visual target detection. *Journal of*  
381 *Neuroscience*, 26(37), 9494-9502.
- 382 Van Essen, D. C., Newsome, W. T., & Maunsell, J. H. (1984). The visual field representation in striate cortex of the  
383 macaque monkey: asymmetries, anisotropies, and individual variability. *Vision Research*, 24(5), 429-448
- 384 van Kerkoerle, T. J., Self, M., Poort, J., van der Togt, C., & Roelfsema, P. R. (2011). High frequencies flow in the  
385 feedforward direction through the different layers of monkey primary visual cortex while low frequencies  
386 flow in the recurrent direction. In *Soc. Neurosci. Abstr* (Vol. 270).
- 387 VanRullen R, Macdonald JS (2012) Perceptual echoes at 10 hz in the human brain. *Current biology*, 22:995-999.
- 388 Vijayan, S., Ching, S., Purdon, P. L., Brown, E. N., & Kopell, N. J. (2013, November). Biophysical modeling of  
389 alpha rhythms during halothane-induced unconsciousness. In *Neural Engineering (NER), 2013 6th*  
390 *International IEEE/EMBS Conference on* (pp. 1104-1107). IEEE.
- 391 Wilke, M., Logothetis, N. K., & Leopold, D. A. (2006). Local field potential reflects perceptual suppression in  
392 monkey visual cortex. *Proceedings of the National Academy of Sciences*, 103(46), 17507-17512.

393

## 394 **Captions**

395 Figure 1: General methodology. **A:** Visual stimuli are presented to three anesthetized monkeys in their bottom left  
396 visual field, while recorded using VSDI in their right visual cortex. The red dot indicates the position of the fovea.

40

20

41

397 **B:** Corresponding retinotopic representations in the three cortical spaces, respectively for monkeys M1, M2 and  
398 M3. The borders V1/V2 (pink dotted lines) were determined based on the ocular dominance maps (see  
399 Supplementary S1). Monkeys were visually stimulated with two protocols. **C:** The “perceptual echoes” stimulation  
400 consisted in the presentation of white-noise luminance sequences within a disc stimulus during 2.8 s (with pre-  
401 stimulus delay of 200 ms). Figure not drawn to scale. **D:** The cross-correlation analysis between each stimulus  
402 sequence and the corresponding VSD response (both were normalized using z-scores) provided an estimate of the  
403 impulse response function (IRF) of the visual system. **E:** The “static wheel” stimulation consisted in the  
404 presentation of stationary wheels, either composed of 8 spokes or 32 spokes, during 500 ms (with pre- and post-  
405 stimulus delays of 500 ms). A 1° diameter Gaussian blob condition presented at the center position of the wheel  
406 stimuli was also used as a control. Figure not drawn to scale. **F:** The spectral analysis of the spatiotemporal VSD  
407 responses corresponding to each condition produced power spectra in low frequency range, giving the possibility to  
408 explore  $\alpha$ -band oscillations in space (spatial  $\alpha$  maps).

409 Figure 2: “Perceptual echoes” protocol. **A:** Impulse response functions (see Fig. 1C-D for the methodology)  
410 averaged over trials (shaded areas represent SEM across trials) for monkey M1, M2 and M3. A visual evoked  
411 response was present in the three monkeys (solid arrows), whereas only monkeys M1 and M2 exhibited an  
412 oscillatory response (dashed arrows). **B:** Corresponding amplitude spectra of the cross-correlation functions (black  
413 traces) for the three monkeys. The same analysis was also done on the cross-correlation functions between each  
414 input sequence and the VSD response from a randomly chosen trial (red traces). **C:** Z-score analysis between the  
415 black and red curves (averaged over 100 repetitions) shown in B. A threshold of 3.09 z-score (horizontal blue lines)  
416 corresponds to a p-value of 0.01 and considered statistically significant.

417 Figure 3: “Static wheel” protocol. The time-courses of the VSD responses for the three stimulation conditions (see  
418 Fig. 1E-F for the methodology; Gaussian stimulus, 8- and 32-spokes wheel stimuli represented in black, blue and  
419 red respectively) are plotted for the three monkeys in panels **A**, **D** and **G** respectively. The corresponding power  
420 spectra, computed by Fourier transformation of the VSD data, are plotted in **B** (8-spokes wheel) and **C** (32-spokes  
421 wheel) for M1, **E** and **F** for M2 and **H** and **I** for M3. The power spectrum of the Gaussian stimulation is

42

43

422 superimposed in each graph in black. Stars denote a statistically significant increase of power magnitude relative to  
423 a 1/f power spectrum (nonparametric one-tailed Wilcoxon signed rank test,  $p < 0.001$ ) computed for each frequency  
424 in the  $\alpha$  range (gray-shaded area) of each power spectra.

425 Figure 4: Spatial activity maps (*top rows*) and spatial  $\alpha$  maps (*bottom rows*) for monkeys M1 and M2 in response to  
426 **A:** the local Gaussian stimulus, **B:** the 8-spokes wheel condition, **C:** the 32-spokes wheel condition. **D:** Averaged  
427 VSD activity (*top rows*) and averaged  $\alpha$  activity (*bottom rows*) over the ROI shown as black contours on top of all  
428 maps to quantitatively compare the three visual stimulation conditions (Local, 8- and 32-spokes wheels in black,  
429 blue and red respectively). \*  $p < 0.001$ , n.s non-significant (Wilcoxon rank sum test).

430 Figure 5: Spatial dependence of  $\alpha$  and VSD activity relative to the center of the 8-spokes wheel condition. **A:**  
431 Isotropic distance map from the center position of the wheel and limited to pixels in the V1 region. The center  
432 positions for M1 and M2 were computed as the centers of mass of the local ROIs depicted in black in Figure 4, for  
433 M1 and M2 respectively. The color code represents the cortical eccentricity from this point expressed in  
434 millimeters. After normalization to their maximum, the distributions (mean  $\pm$  SD) of VSD amplitude (black lines)  
435 and  $\alpha$  amplitude (blue lines) in response to the 8-spokes wheel stimulus (see maps in Fig. 4B) were plotted as a  
436 function of eccentricity from center in panel **B** for M1 and in panel **C** for M2.

437

45

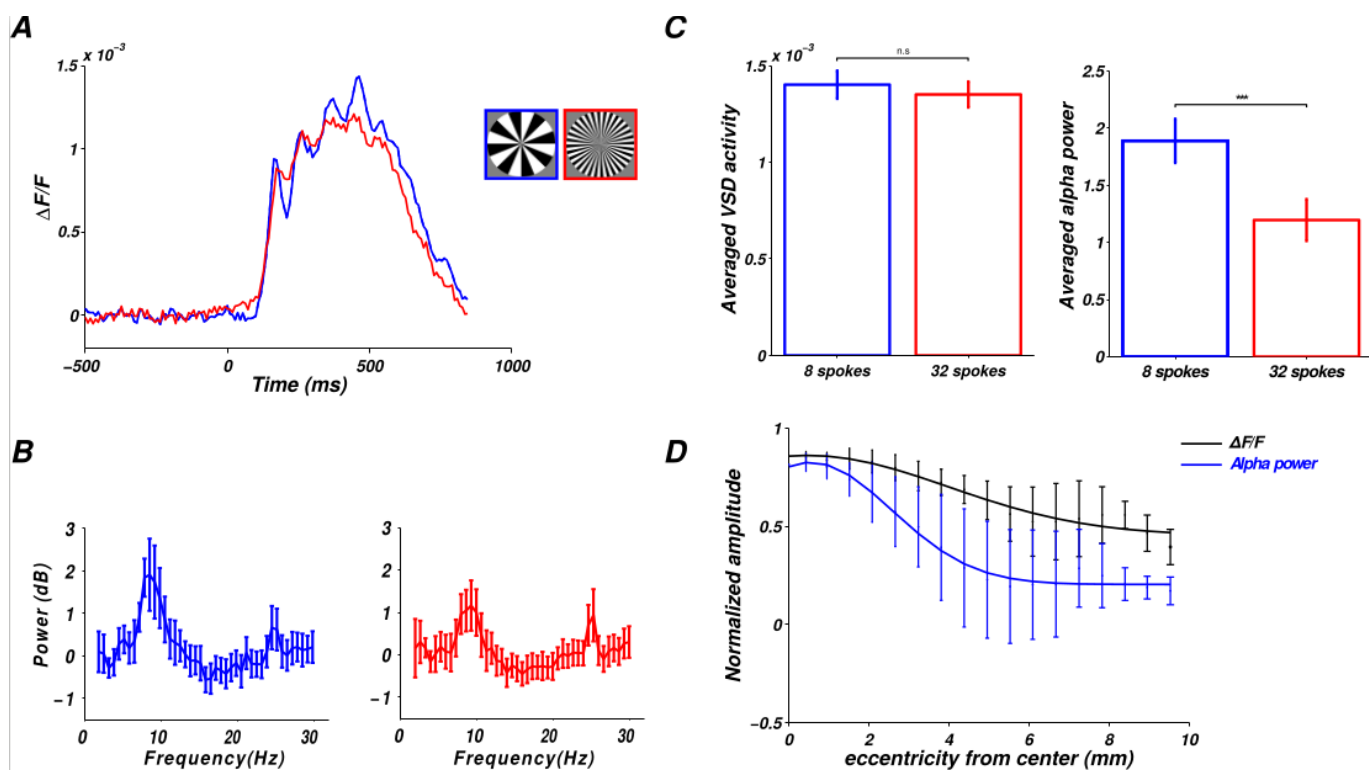

439 Supplementary Figure : Results reproducibility. Another recording session in monkey M2 one week later reported a  
440 strong  $\alpha$  power increase in response to the 8-spoke wheel stimulus (blue traces) with the same characteristics: its  
441 dissociation with VSD evoked activity (A-C), its dependence with the spatial frequency of the stimulus (B-C) and  
442 its spatial relationship with the center of the wheel (D).

46

23
